# Supplementary material
Source: publisher figshare collection journal article supplement (https://karger.figshare.com/articles/dataset/_/28558211)
Supplement: Supplementary file 1 [file 1]

**Table S1. Comparison of Baseline Characteristics Between Severe and Mild-to-Moderate Asthma Groups in Non-smokers**

| Variables | mild-to-moderate asthma exacerbation group in non-smokers（n=224） | severe asthma exacerbation group in non-smokers（n=151） | t/χ²/Z | *P*-values |
| --- | --- | --- | --- | --- |
| age, years, Median(IQR) | 52.5（43,61） | 54（42,65） | 14.228 | <0.001* |
| Age of asthma onset, Median(IQR) | 46（35,55.92） | 46（32.5,55.75） | 0.615 | 0.433 |
| Gender |  |  |  |  |
| male, n(%) | 54（24.1） | 36（23.8） | 0.004 | 0.953 |
| female, n(%) | 170（75.9） | 115（76.2） |  |
| BMI, (kg/m2), Median(IQR) | 23.42（21.52,25.15） | 22.44（20.99,25.33） | 1.401 | 0.236 |
| food allergy history, n(%) | 44（19.6） | 33（21.9） | 0.270 | 0.603 |
| aeroallergen allergy history, n(%) |  |  |  |  |
| Pollen, n(%) | 14（6.3） | 8（5.3） | 0.148 | 0.700 |
| Mold Spores, n(%) | 11（4.9） | 10（6.6） | 0.500 | 0.480 |
| Animal Dander, n(%) | 7（3.1） | 9（6.0） | 1.775 | 0.201 |
| Dust, n(%) | 10（4.5） | 15（9.9） | 4.337 | 0.056 |
| Smoke, n(%) | 5（2.2） | 7（4.6） | 1.682 | 0.236 |
| family history of asthma, n(%) | 31（13.8） | 44（29.1） | 13.196 | <0.001* |
| duration of disease, years, Median(IQR) | 2.5（0.27,6） | 10（4,28） | 41.874 | <0.001* |
| Asthma control test score, Median(IQR) | 18（17,21） | 14（12.5,17） | 190.166 | <0.001* |
| hospitalization or emergency room visits for asthma exacerbation in the past 1 year, n(%) | 37（16.5） | 92（60.9） | 78.828 | <0.001* |
| total IgE antibody, (IU/ml), Median(IQR) | 171（41.33,305.46） | 258（122.5,557.68） | 8.502 | 0.004* |
| FeNO, (ppb), Median(IQR) | 40.00（23.00,69.00） | 41.00（20.50,68.00） | 0.048 | 0.826 |
| Induced sputum cell classification |  |  |  |  |
| neutrophil ratio, (%), Median(IQR) | 63.0（42.8,74.8） | 66.0（42.6,83.0） | 0.676 | 0.411 |
| eosinophilic ratio, (%), Median(IQR) | 3.2（0.03,19.20） | 8.4（1.1,20.9） | 2.357 | 0.125 |
| Macrophage ratio, (%), Median(IQR) | 24.0（11.7,40.75） | 16.7（7.5,37.1） | 1.125 | 0.289 |
| lymphocyte ratio, (%), Median(IQR) | 0（0,0） | 0（0,0） | 3.186 | 0.074 |
| blood routine |  |  |  |  |
| leucocyte count, (x10^9/L), Median(IQR) | 6（5.15,7.28） | 7.65（5.65,9.34） | 13.468 | <0.001* |
| hemoglobin, (g/L), Median(IQR) | 130（122,140.25） | 134（124,143） | 2.207 | 0.137 |
| platelets, (x10^9/L), Median(IQR) | 247.5（206.25,281.0） | 250.0（202.0,286.0） | 0.805 | 0.370 |
| mean platelet volume, (fL), Median(IQR) | 10.3（9.7,10.83） | 10.1（9.5,10.8） | 0.281 | 0.596 |
| absolute eosinophil count, (x10^9/L), Median(IQR) | 0.29（0.15,0.45） | 0.32（0.12,0.60） | 2.472 | 0.116 |
| eosinophilic ratio, (%),Median(IQR) | 4.4（2.1,6.93） | 4.7（1.70,8.10） | 0.084 | 0.773 |
| absolute neutrophil count, (x10^9/L), Median(IQR) | 3.06（2.64,4.12） | 4.38（2.89,6.00） | 20.009 | <0.001* |
| neutrophil ratio, (%),Median(IQR) | 54.3（48.02,58.78） | 56.8（49.5,70.8） | 12.765 | <0.001* |
| absolute lymphocyte count, (x 10^9/L), Median(IQR) | 1.96（1.52, 2.31） | 1.90（1.47, 2.30） | 0.474 | 0.491 |
| NLR, Median(IQR) | 1.69（1.30,2.14） | 2.08（1.42,3.59） | 17.838 | <0.001* |
| PLR, Median(IQR) | 123.62（101.82,150.31） | 134.03（102.60,170.27） | 4.167 | 0.041* |
| albumin, (g/L), Median(IQR) | 42.0（40.0,44.23） | 41.7（38.95,44.05） | 0.963 | 0.327 |
| creatinine, (umol/L), Median(IQR) | 65.0（57.48,77.25） | 67.0（57.0,79.0） | 0.579 | 0.447 |
| glomerular filtration rate, (ml/min), Median(IQR) | 95.35（87.63,105.07） | 89.39（80.97,102.86） | 6.401 | 0.011* |
| fasting blood glucose, (mmol/L), Median(IQR) | 4.96（4.59,5.29） | 5.16（4.77,5.6） | 9.758 | 0.002* |
| uric acid, (mmol/L), Median(IQR) | 297.5（247.0,365.0） | 323.0（253.0,380.0） | 1.221 | 0.269 |
| CO2CP, (mmol/L), Median(IQR) | 25.05（23.45,27.03） | 25.5（23.4,27.3） | 0.045 | 0.832 |
| LDL-C, (mmol/L), Median(IQR) | 2.65（2.14,3.13） | 2.79（2.29,3.45） | 3.353 | 0.067 |
| triglycerides, (mmol/L), Median(IQR) | 1.04（0.75,1.48） | 0.92（0.72,1.34） | 1.315 | 0.251 |
| CRP, (mg/L), Median(IQR) | 1.47（0.64,3.09） | 1.66（0.87,3.99） | 10.313 | 0.082 |
| Procalcitonin, (ng/ml), Median(IQR) | 0.02（0.02,0.05） | 0.05（0.02,0.10） | 3.216 | 0.073 |
| LDH, (U/L), Median(IQR) | 153（140,165.50） | 165（148,194） | 23.497 | <0.001* |
| creatine kinase, (U/L), Median(IQR) | 71.00（55.50,90.00） | 75.00（54.00,187.50） | 0.210 | 0.646 |
| CK-MB(ug/L), Median(IQR) | 1.92（1.10,8.97） | 2.40（1.39.8.66） | 2.361 | 0.124 |
| ACE, (U/L), Median(IQR) | 52.55（41.0,75.0） | 49.40（35.63,63.95） | 5.200 | 0.023* |
| Troponin I, (ug/L), Median(IQR) | 0.00（0.03,0.06） | 0.01（0.03,0.07） | 2.701 | 0.100 |
| myoglobin, ( ug/L), Median(IQR) | 10.81（7.76,21.00） | 18.69（10.40,28.85） | 11.205 | <0.001* |
| NT-proBNP,(pg/ml), Median(IQR) | 76.20（66.98,112.43） | 130.56（75.24，267.2） | 17.647 | <0.001* |
| D-dimer, (ng/ml), Median(IQR) | 100.00（100.00,116.14） | 196.74（100.00，533.85） | 17.483 | <0.001* |
| Pulmonary function test |  |  |  |  |
| FEV1, (L), Median(IQR) | 2.00（1.72,2.60） | 1.91（1.36,2.40） | 17.719 | <0.001* |
| FEV1 predicted, (%), Median(IQR) | 89.25（73.35,99.175） | 79（58.85,90.2） | 11.084 | 0.001* |
| FEV1/FVC ratio, (%), Median(IQR) | 73.40（66.98,76.64） | 64.41（54.2,71.41） | 23.163 | <0.001* |
| MMEF75/25, (L/S), Median(IQR) | 1.26（0.86,1.77） | 1.11（0.70,1.69） | 2.180 | 0.140 |
| MMEF50, (L/S), Median(IQR) | 1.73（1.12,2.35） | 1.48（0.89,2.40） | 3.616 | 0.057 |
| Comorbidities |  |  |  |  |
| hypertension, n(%) | 50（22.3） | 52（34.4） | 6.686 | 0.01* |
| diabetes, n(%) | 12（5.4） | 19（12.7） | 6.314 | 0.02* |
| coronary heart disease, n(%) | 3（1.3） | 5（3.3） | 1.680 | 0.195 |
| gastroesophageal reflux disease, n(%) | 22（9.8） | 22（14.6） | 3.234 | 0.198 |
| chronic sinusitis/rhinitis, n(%) | 108（48.2） | 78（51.7） | 0.427 | 0.513 |
| anxiety/depression, n(%) | 11（4.9） | 6（4.0） | 5.516 | 0.063 |
| Asthma medication use |  |  |  |  |
| overuse SABA, n(%) | 7（3.1） | 27（17.9） | 23.82 | <0.001* |
| stop ICS before onset, n(%) | 105（46.9） | 65（43.0） | 0.534 | 0.465 |
| current use or discontinuation of OCS within the past 7 days, n(%) | 3（1.3） | 20（13.2） | 22.09 | <0.001* |
| use of sedatives, n(%) | 9（4.0） | 9（6.0） | 1.404 | 0.496 |

Note: *:P < 0.05; SD: standard deviation; IQR: Inter-quartile Range; FeNO: Fractional exhaled nitric oxide; NLR: Neutrophil-to-lymphocyte ratio; PLR: Platelet-to-lymphocyte ratio; CO2CP: carbon dioxide combining power; LDL-C: low-density lipoprotein cholesterol; CRP: hypersensitive C-reactive protein; LDH: lactate dehydrogenase; CK-MB: creatine kinase isoenzyme; ACE: angiotensin converting enzyme; NT-proBNP: N-Terminal pro-Brain Natriuretic Peptide; FEV1: Forced expiratory volume in one second; FVC: Forced vital capacity; MMEF75/25: 75/25% of maximum mid-expiratory flow; MMEF50: Forced expiratory flow after 50％of the FVC has been exhaled; SABA: Short-acting β2 agonist; ICS: inhaled corticosteroids; OCS: Oral Corticosteroids.
